# Supplementary material
Source: PubMed Central journal article supplement (PMC2726306)
Supplement: mmc1.pdf [file mmc1.pdf]

Biophysical Journal, Volume 97

**Supporting Material**

**Cellular Morphogenesis In Silico**

Troy Shinbrot, Young Chun, Carlos Caicedo-Carvajal, and Ramsey Foty

Legends for supplemental movies:

Disk Movie 1: The "Discotic" state, which assembles into a striped ellipsoid, here at heterotypic strength = -0.125 and homotypic strength = 0.25

Homocluster Movie 2: The "Homocluster" state, which assembles when like particles attract and unlike particles repel, here at heterotypic strength = 0.167, and homotypic strength = -0.05

Inelastic Collapse Movie 3: The "Inelastic Collapse" state, which assembles when no particle is attractive, but unlike particles repel, leading to like particles colliding with one another and leaving inelastic islands, here at heterotypic strength = 0.25 and homotypic strength = 0

Marble Movie 4: The "Marble" state, which contains alternating layers of cells, externally resembling an olive containing a pimento, here at heterotypic strength = -0.05 and homotypic strength = 0.1
